# Supplementary figures and images for: Chest Pain from Pneumopericardium with Gastropericardial Fistula
Source: Hindawi journal article supplement (doi:10.1155/2021/5143608), 2021-07-14

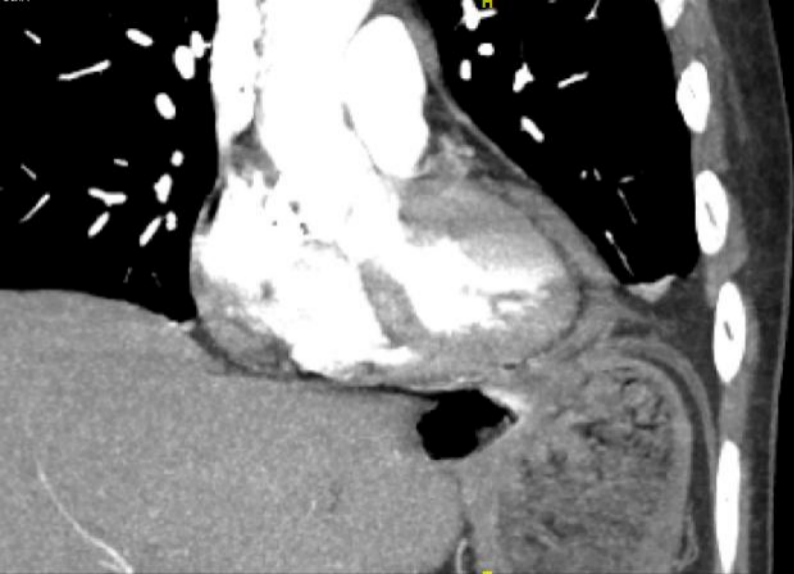

Supplement: f1 [file 5143608.f1.zip]

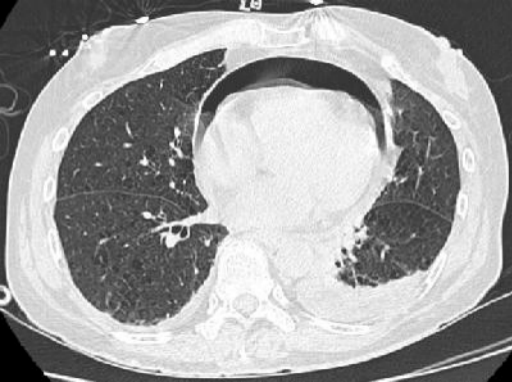

Supplement: f1 [file 5143608.f1.zip]
